# Supplementary material for: Bypasses in intracellular glucose metabolism in iron‐limited Pseudomonas putida
Source: PubMed Central journal article supplement (PMC4767421; doi:10.1002/mbo3.287), 2015-09-16
Supplement: MBO3-5-003-s001.pdf [file MBO3-5-003-s001.pdf]

# **Bypasses in Intracellular Glucose Metabolism in Iron-Limited *Pseudomonas putida***

**Samantha S. Sasnow, Hua Wei, and Ludmilla Aristilde\***

Department of Biological and Environmental Engineering, College of Agricultural and Life Sciences, Cornell University, Ithaca, NY 14853, USA

\*Corresponding author: Department of Biological and Environmental Engineering, Cornell University, Ithaca, NY 14853 USA. Phone: (607) 255-6845. Fax: (607) 607.255.4449. E-mail: ludmilla@cornell.edu

## **SUPPLEMENTARY INFORMATION**

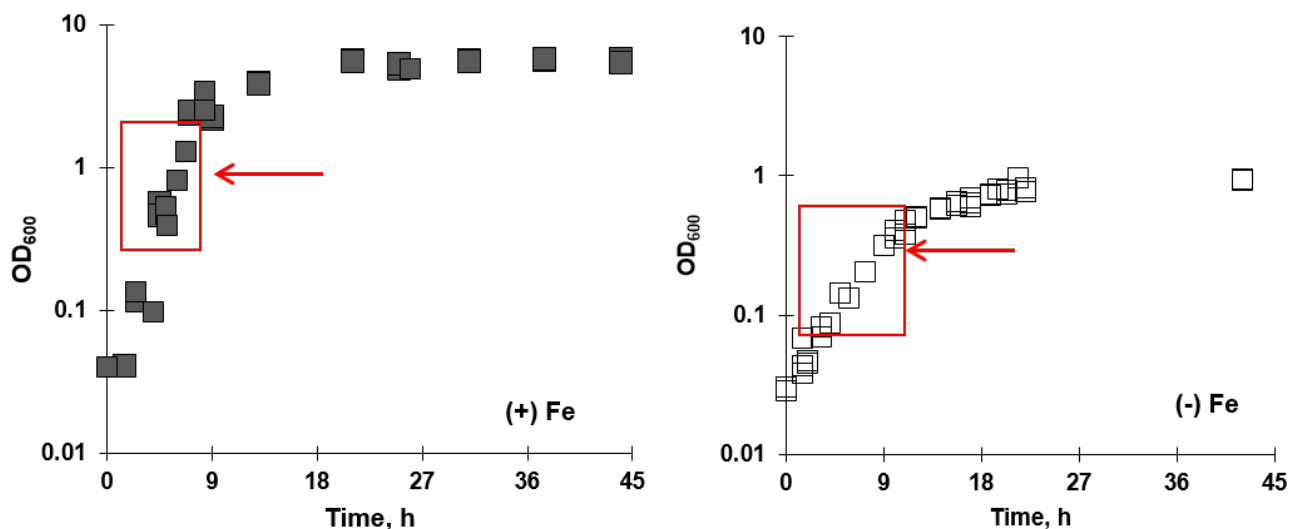

**Fig. S1.** Growth curves of *P. putida* on glucose under Fe-replete [(+)Fe] and Fe-limited [(-)Fe] conditions. Data are from four biological replicates of batch cultures. The red square indicates the sampling time during early to mid-exponential growth phase when data were taken to determine excretion rates and growth rate. Red arrows indicate sampling points for steady state, kinetic and intracellular quantitation experiments.

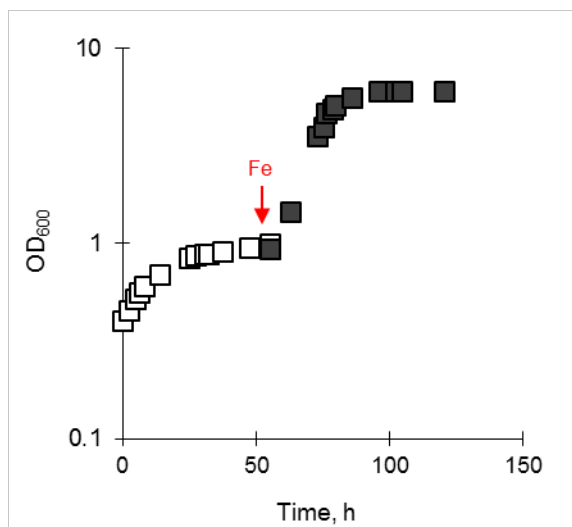

**Fig. S2.** Effects of iron (Fe) addition (30  $\mu$ M) on the growth of Fe-limited cells; the time when Fe was added is shown. The data obtained with Fe-limited cells before and after Fe addition are shown with the white-filled and black-filled squares, respectively. Data points are from independent biological replicates ( $n = 2$  to 5).

**Table S1.** Specific rates ( $\mu\text{mol g}_{\text{CDW}}^{-1} \text{h}^{-1}$ ) of siderophore and metabolite secretions in exponentially-growing *P. putida* KT2440 under Fe-Replete [(+)Fe] and Fe-Limiting [(-)Fe] conditions.

|                              | (+)Fe         | (-)Fe          | # of carbons invested |
|------------------------------|---------------|----------------|-----------------------|
| <i>Siderophore Secretion</i> |               |                |                       |
| Pyoverdine                   | ND            | 23.7 ± 4.4     | 62                    |
| <i>Metabolite Secretion</i>  |               |                |                       |
| Gluconate                    | 94.7 ± 13.9   | 1074.1 ± 223.0 | 6                     |
| 3-phosphoglycerate           | 2.68 ± 0.52   | ND             | 3                     |
| Pyruvate                     | 4.67 ± 1.66   | 0.07 ± 0.00    | 3                     |
| 6-phosphogluconate           | --            | 0.115 ± 0.090  | 6                     |
| Phosphoenolpyruvate          | 0.002 ± 0.001 | ND             | 3                     |
| Citrate                      | ND            | 4.73 ± 2.10    | 6                     |
| $\alpha$ -ketoglutarate      | ND            | 0.018 ± 0.002  | 5                     |
| Glutamate                    | ND            | 0.023 ± 0.009  | 5                     |
| Succinate                    | ND            | ND             | 4                     |
| Fumarate                     | 0.023 ± 0.007 | 0.004 ± 0.000  | 4                     |
| Malate                       | 0.005 ± 0.001 | 0.036 ± 0.017  | 4                     |
| Aspartate                    | ND            | ND             | 4                     |

ND: indicates that the quantified metabolites or siderophore were neither detected nor accumulated in the extracellular medium over the course of the exponential growth of the cells.

**Table S2.** Carbon requirement for pyoverdine biosynthesis

| Pyoverdine Components                  | Metabolite Precursors                                                       | # of Carbons from Metabolic Pathways       |                           |                          |
|----------------------------------------|-----------------------------------------------------------------------------|--------------------------------------------|---------------------------|--------------------------|
|                                        |                                                                             | Downstream of the Entner-Doudoroff pathway | Pentose phosphate Pathway | Tricarboxylic acid cycle |
| Tetradecanoic acid <sup>a</sup>        | 7 Acetyl-CoA                                                                | 14                                         |                           |                          |
| Succinate                              | 1 succinate                                                                 |                                            |                           | 4                        |
| Chromophore (1 diaminobutyrate +1 Tyr) | 1 $\alpha$ -ketoglutarate + 2 phosphoenolpyruvate + 1 erythrose-4-phosphate | 6                                          | 4                         | 5                        |
| Aspartate                              | 1 oxaloacetate                                                              |                                            |                           | 4                        |
| Ornithine (1 glutamate)                | 1 $\alpha$ -ketoglutarate                                                   |                                            |                           | 5                        |
| Hydroxyl-aspartate                     | 1 oxaloacetate                                                              |                                            |                           | 4                        |
| Diaminobutyrate (1 glutamate)          | 1 $\alpha$ -ketoglutarate                                                   |                                            |                           | 5                        |
| Glycine (1 serine)                     | 1 3-phosphoglycerate                                                        | 3                                          |                           |                          |
| Serine                                 | 1 3-phosphoglycerate                                                        | 3                                          |                           |                          |
| Cyclic ornithine (1 glutamate)         | 1 $\alpha$ -ketoglutarate                                                   |                                            |                           | 5                        |

<sup>a</sup>Tetradecanoic acid is attached to the pre-pyoverdine molecule that is excreted from the cytosol into the periplasm.

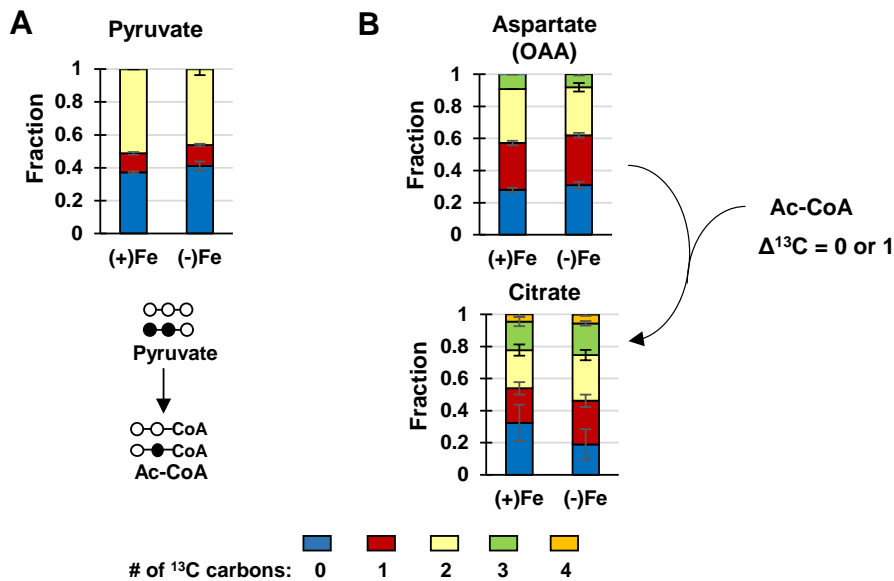

**Fig. S3. Estimation of Acetyl-CoA (Ac-CoA) labeling.**

Biosynthesis of Ac-CoA from pyruvate and (B) Biosynthesis of citrate from the combination of aspartate and acetyl-CoA (Ac-CoA). The Ac-CoA labeling deduced from pyruvate was confirmed by the difference in the labeling patterns of aspartate and citrate.

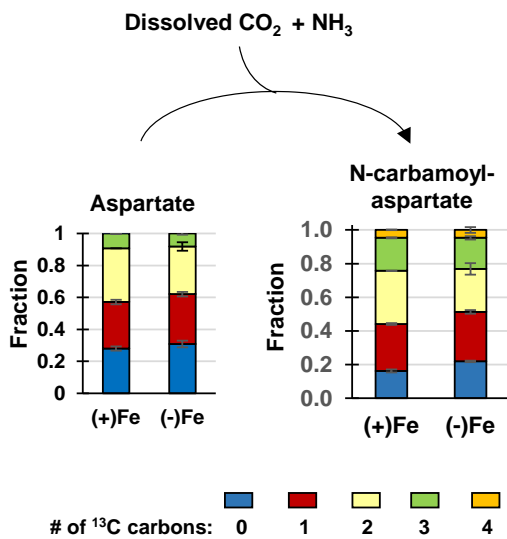

**Fig. S4. Estimation of  $\text{CO}_2$  labeling**

Biosynthesis of N-carbamoyl-aspartate from aspartate. N-carbamoyl-aspartate is formed from aspartate following the incorporation of dissolved  $\text{CO}_2$  and ammonia from the extracellular medium. Addition of  $^{13}\text{C}$ -labeled carbons from aspartate to N-carbamoyl-aspartate is taken as the addition of labeled dissolved  $\text{CO}_2$ .



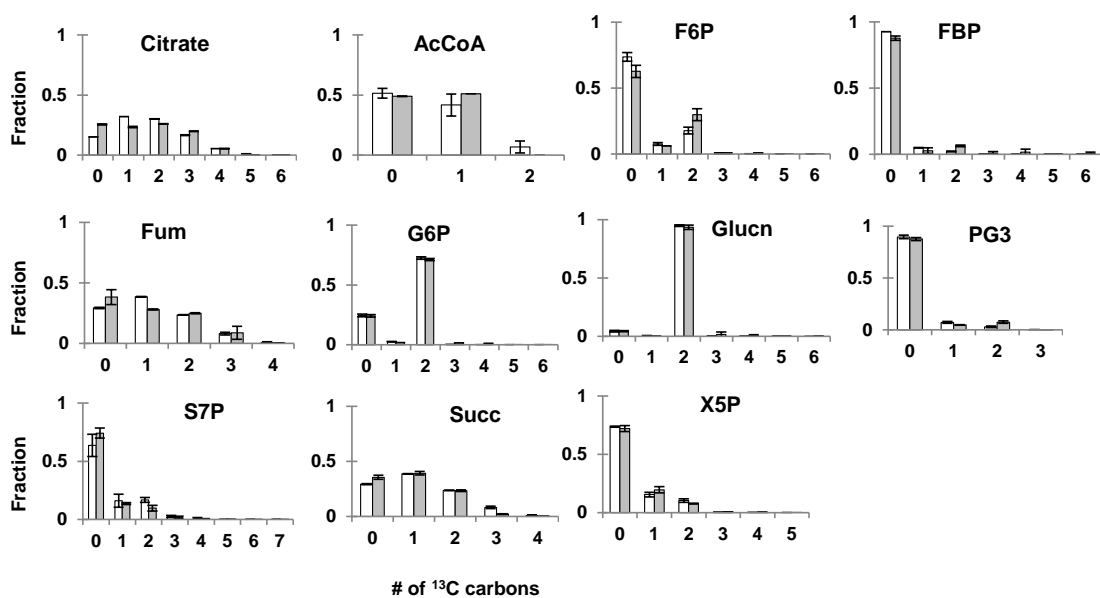

**Fig. S6.** Model-estimated (white bars) and experimentally-determined (black bars) of isotopomer distributions in the carbon labeling patterns of selected metabolites in Fe-replete *P. putida* cells. Data presented is the average of two independent optimizations of experimental data with two model predictions, both shown with standard deviation error bars. Legend for metabolite names: G6P, glucose-6-phosphate; F6P, fructose-6-phosphate; FBP, fructose-1,6-bisphosphate; PG3, 3-phosphoglycerate; X5P, xylulose-5-phosphate; S7P, sedoheptulose-7-phosphate; Succ, succinate; Glucn, gluconate; AcCoA, acetyl coenzyme A; Fum, fumarate.

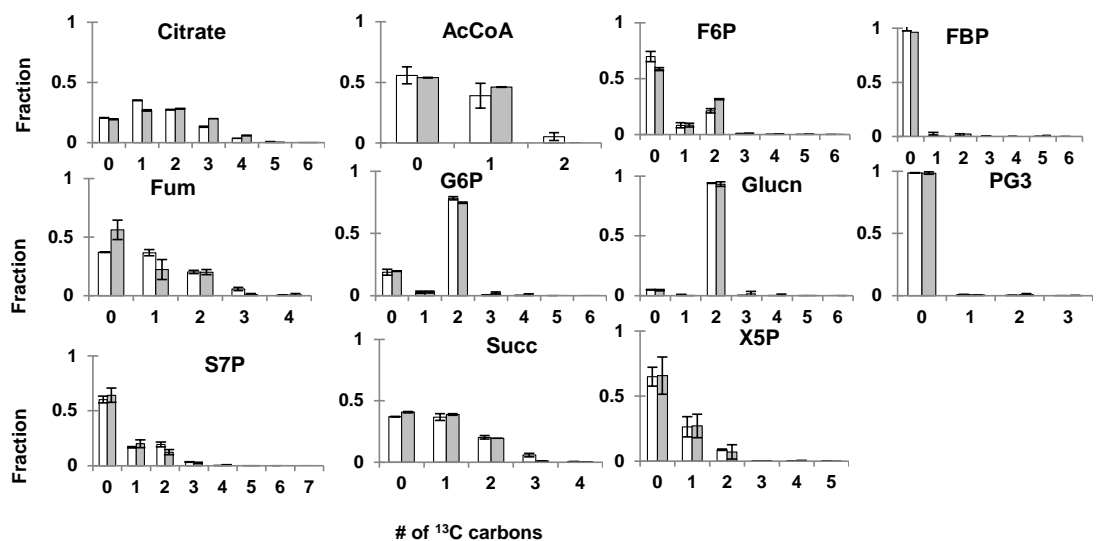

**Fig. S7.** Model-estimated (white bars) and experimentally-determined (black bars) of isotopomer distributions in the carbon labeling patterns of selected metabolites in Fe-limited *P. putida* cells. Data presented is the average of two independent optimizations of experimental data with two model predictions, both shown with standard deviation error bars. Legend for metabolite names: G6P, glucose-6-phosphate; F6P, fructose-6-phosphate; FBP, fructose-1,6-bisphosphate; PG3, 3-phosphoglycerate; X5P, xylulose-5-phosphate; S7P, sedoheptulose-7-phosphate; Succ, succinate; Glucn, gluconate; AcCoA, acetyl coenzyme A; Fum, fumarate.

**Table S3.** Intracellular metabolic rates determined from quantitative flux modeling of the metabolism in Fe-replete [(+)Fe] and Fe-limited [(-)Fe] *P. putida* using the 13CFLUX2 software. These metabolic fluxes are illustrated in Fig. 6C and Fig. 6D. Refer to Fig 1 for the legend of metabolite names.

| Reactions                                                   | (+)Fe                                 | (-)Fe        |
|-------------------------------------------------------------|---------------------------------------|--------------|
|                                                             | mM gCDW <sup>-1</sup> h <sup>-1</sup> |              |
| Gluc <sub>extracellular</sub> → Gluc <sub>periplasmic</sub> | 4.71±0.30                             | 2.46±0.20    |
| Gluc <sub>periplasmic</sub> → G6P                           | 0.91±0.12                             | 0.23±0.20    |
| Gluc <sub>periplasmic</sub> → Glucn <sub>periplasmic</sub>  | 3.80±0.26                             | 2.23±0.27    |
| Glucn <sub>periplasmic</sub> → 6P-Glucn                     | 3.67±0.25                             | 1.03±0.22    |
| G6P → 6P-Glucn                                              | 1.62±0.22                             | 0.50±0.12    |
| G6P → F6P                                                   | -0.80±0.31                            | -0.29±0.09   |
| FBP → F6P                                                   | 0.96±0.32                             | 0.29±0.09    |
| DHAP + GAP → FBP                                            | 0.96±0.32                             | 0.29±0.09    |
| GAP → 3-PG                                                  | 3.02±0.41                             | 0.89±0.11    |
| 3-PG → PEP                                                  | 2.55±0.41                             | 0.79±0.11    |
| PEP → Pyr                                                   | 2.48±0.34                             | 0.77±0.11    |
| 6P-Glucn → Pyr+GAP                                          | 5.22±0.43                             | 1.51±0.15    |
| 6P-Glucn → R5P                                              | 0.037±0.004                           | 0.016±0.002  |
| 6P-Glucn → Xu5P                                             | 0.037±0.004                           | 0.015±0.002  |
| GAP+S7P → Xu5P+R5P                                          | 0.024±0.003                           | 0.019±0.002  |
| GAP+S7P → E4P+F6P                                           | 0.024±0.003                           | 0.019±0.002  |
| E4P+Xu5P → F6P+GAP                                          | -0.18±0.01                            | -0.026±0.002 |
| Pyr → Acetyl-CoA+CO <sub>2</sub>                            | 4.58±0.29                             | 1.75±0.17    |
| OAA+Acetyl-CoA → Citrate                                    | 4.13±0.27                             | 1.63±0.17    |
| Citrate → α-KG                                              | 4.11±0.28                             | 1.62±0.17    |
| α-KG → Succinate+CO <sub>2</sub>                            | 3.50±0.24                             | 1.47±0.16    |
| Succinate → Fumarate                                        | 3.51±0.24                             | 1.45±0.16    |
| Fumarate → Malate                                           | 3.57±0.24                             | 1.46±0.16    |
| Malate → OAA                                                | 1.79±0.18                             | 1.32±0.15    |
| Malate → Pyr                                                | 1.65±0.25                             | 0.14±0.01    |
| Pyr+CO <sub>2</sub> → OAA                                   | 3.59±0.26                             | 0.52±0.04    |
| OAA → PEP+CO <sub>2</sub>                                   | 0.35±0.10                             | 0.07±0.01    |
| OAA → Fumarate                                              | 0.060±0.004                           | 7.6±0.7E-3   |



**Table S4.** Normalized reaction rates (%)<sup>1</sup> from metabolic flux balance analysis in Fe-replete [(+)Fe] *P. putida* KT2440.

| Fe conditions                                              | (+)Fe                  | (+)Fe                     | (+)Fe                  | (+)Fe                  | (+)Fe         | (-)Fe         |
|------------------------------------------------------------|------------------------|---------------------------|------------------------|------------------------|---------------|---------------|
| Source                                                     | Fuhrer et al., 2005    | del Castillo et al., 2007 | Blank et al., 2008     | Sudarsan et al., 2014  | Present study | Present study |
| Gluc <sub>periplasmic</sub> → G6P                          | 100 ± 7.5              | NR                        | 100 ± 3                | 100 ± 2.3              | 19.3 ± 2.3    | 9.2 ± 8.0     |
| Gluc <sub>periplasmic</sub> → Glucn <sub>periplasmic</sub> | NR                     | NR                        | NR                     | NR                     | 80.6 ± 2.3    | 90.8 ± 8.0    |
| Glucn <sub>periplasmic</sub> → 6P-Glucn                    | NR                     | NR                        | NR                     | NR                     | 78.0 ± 1.9    | 42.0 ± 8.0    |
| G6P → 6P-Glucn                                             | 104.8 ± 9.4            | NR                        | NR                     | 99.5 ± 5.4             | 34.3 ± 4.0    | 20.5 ± 4.4    |
| 6P-Glucn → Xu5P + CO <sub>2</sub>                          | 2.7 ± 0.6 <sup>2</sup> | NR                        | 5.5 ± 0.5 <sup>2</sup> | 1.3 ± 0.4 <sup>2</sup> | 0.8 ± 0.1     | 0.6 ± 0.1     |
| 6P-Glucn → R5P + CO <sub>2</sub>                           | 2.7 ± 0.6 <sup>2</sup> | NR                        | 5.5 ± 0.5 <sup>2</sup> | 1.3 ± 0.4 <sup>2</sup> | 0.8 ± 0.1     | 0.6 ± 0.0     |
| Xu5P → R5P                                                 | NR                     | NR                        | NR                     | NR                     | 4.1 ± 0.1     | 0.9 ± 0.0     |
| GAP and S7P → Xu5P and R5P                                 | -0.9 ± 0.3             | NR                        | NR                     | 0.5 ± 0.5              | 0.5 ± 0.0     | 0.7 ± 0.0     |
| GAP and S7P → E4P and F6P                                  | 0.9 ± 0.3              | NR                        | NR                     | 0.5 ± 0.5              | 0.5 ± 0.0     | 0.7 ± 0.0     |
| F6P and GAP → E4P and Xu5P                                 | 2.0 ± 0.3              | NR                        | NR                     | 0.0 ± 0.5              | 3.8 ± 0.1     | 1.0 ± 0.0     |
| F6P → G6P                                                  | 5.3 ± 3.1              | NR                        | 0 ± 3                  | 0 ± 5                  | 17.0 ± 6.5    | 11.6 ± 3.7    |
| FBP → F6P                                                  | NR                     | NR                        | NR                     | 0 ± 5                  | 20.4 ± 6.6    | 11.9 ± 3.6    |
| DHAP + GAP → FBP                                           | 6.6 ± 3.3              | NR                        | 0 ± 3                  | 0 ± 5                  | 20.4 ± 6.6    | 11.9 ± 3.6    |
| GAP → DHAP                                                 | NR                     | NR                        | NR                     | NR                     | 22.4 ± 6.7    | 12.2 ± 3.6    |
| 6P-Glucn → Pyruvate + GAP                                  | 99.6 ± 9.5             | NR                        | 89 ± 5                 | 96.8 ± 5.4             | 110.7 ± 5.7   | 61.2 ± 3.6    |
| GAP → 3-PG                                                 | 83.5 ± 6.1             | NR                        | 86 ± 2                 | 96.4 ± 5.4             | 64.0 ± 7.7    | 36.0 ± 3.6    |
| 3-PG → PEP                                                 | 71.2 ± 5.7             | NR                        | 68 ± 2                 | 88.7 ± 5.4             | 54.1 ± 8.0    | 32.1 ± 3.6    |
| PEP → Pyruvate                                             | 81.2 ± 7.0             | NR                        | 71 ± 2                 | 100 ± 6.3              | 52.7 ± 6.3    | 31.3 ± 3.6    |
| Pyruvate → Acetyl-CoA + CO <sub>2</sub>                    | 119.5 ± 13.8           | NR                        | 90 ± 7                 | 146.2 ± 9.9            | 97.3 ± 0.3    | 71.1 ± 3.8    |
| Pyruvate + CO <sub>2</sub> → OAA                           | 85.0 ± 8.4             | 78.0 ± 3.9 <sup>3</sup>   | 57 ± 4                 | 33.0 ± 6.8             | 76.3 ± 2.4    | 21.0 ± 0.4    |
| OAA + Acetyl-CoA → Citrate                                 | 102.7 ± 13.8           | 100                       | NR                     | 134.8 ± 10.9           | 87.7 ± 1.7    | 66.1 ± 4.2    |
| Citrate → α-KG + CO <sub>2</sub>                           | 102.7 ± 13.8           | NR                        | 68 ± 7                 | 134.8 ± 16.7           | 87.3 ± 1.9    | 66.0 ± 4.1    |
| α-KG → Succinate + CO <sub>2</sub>                         | 92.6 ± 13.8            | NR                        | NR                     | 126.7 ± 18.1           | 74.2 ± 1.8    | 59.7 ± 4.1    |
| Succinate → Fumarate                                       | NR                     | NR                        | 55 ± 7                 | 126.7 ± 12.2           | 74.5 ± 1.6    | 59.0 ± 4.2    |
| Fumarate → Malate                                          | NR                     | NR                        | NR                     | NR                     | 75.8 ± 1.6    | 59.3 ± 4.2    |
| Malate → OAA                                               | 45.7 ± 9.3             | 40.3 ± 2.0 <sup>3</sup>   | 37 ± 3                 | 126.7 ± 10.4           | 38.1 ± 3.0    | 53.4 ± 4.5    |
| Citrate → Glyx + Succinate                                 | NR                     | NR                        | NR                     | 0.0 ± 8.6              | 0.3 ± 0.2     | 0.0 ± 0.0     |
| Glyx + Acetyl-CoA → Malate                                 | NR                     | NR                        | NR                     | NR                     | 0.3 ± 0.2     | 0.0 ± 0.0     |
| Malate → Pyruvate and CO <sub>2</sub>                      | 46.9 ± 7.0             | 40.7 ± 2.0 <sup>3</sup>   | 18 ± 2                 | NR                     | 35.1 ± 4.8    | 5.9 ± 0.3     |
| OAA → PEP and CO <sub>2</sub>                              | 16.0 ± 2.3             | NR                        | 18 ± 5                 | 15.8 ± 1.4             | 7.5 ± 2.0     | 2.9 ± 0.0     |
| OAA → Fumarate                                             | NR                     | NR                        | NR                     | NR                     | 1.3 ± 0.0     | 0.31 ± 0.01   |

<sup>1</sup>Reaction rates were normalized to the glucose uptake rate. Metabolite names are the same as shown in Fig. 1.

<sup>2</sup>This represents half of the summed reaction rate from 6P-Glucn to PPP reported in the previous studies.

<sup>3</sup>The 95% confidence intervals were reported to be within 5% of the averaged values. NR: indicates that the rates of these metabolic reactions were not reported.

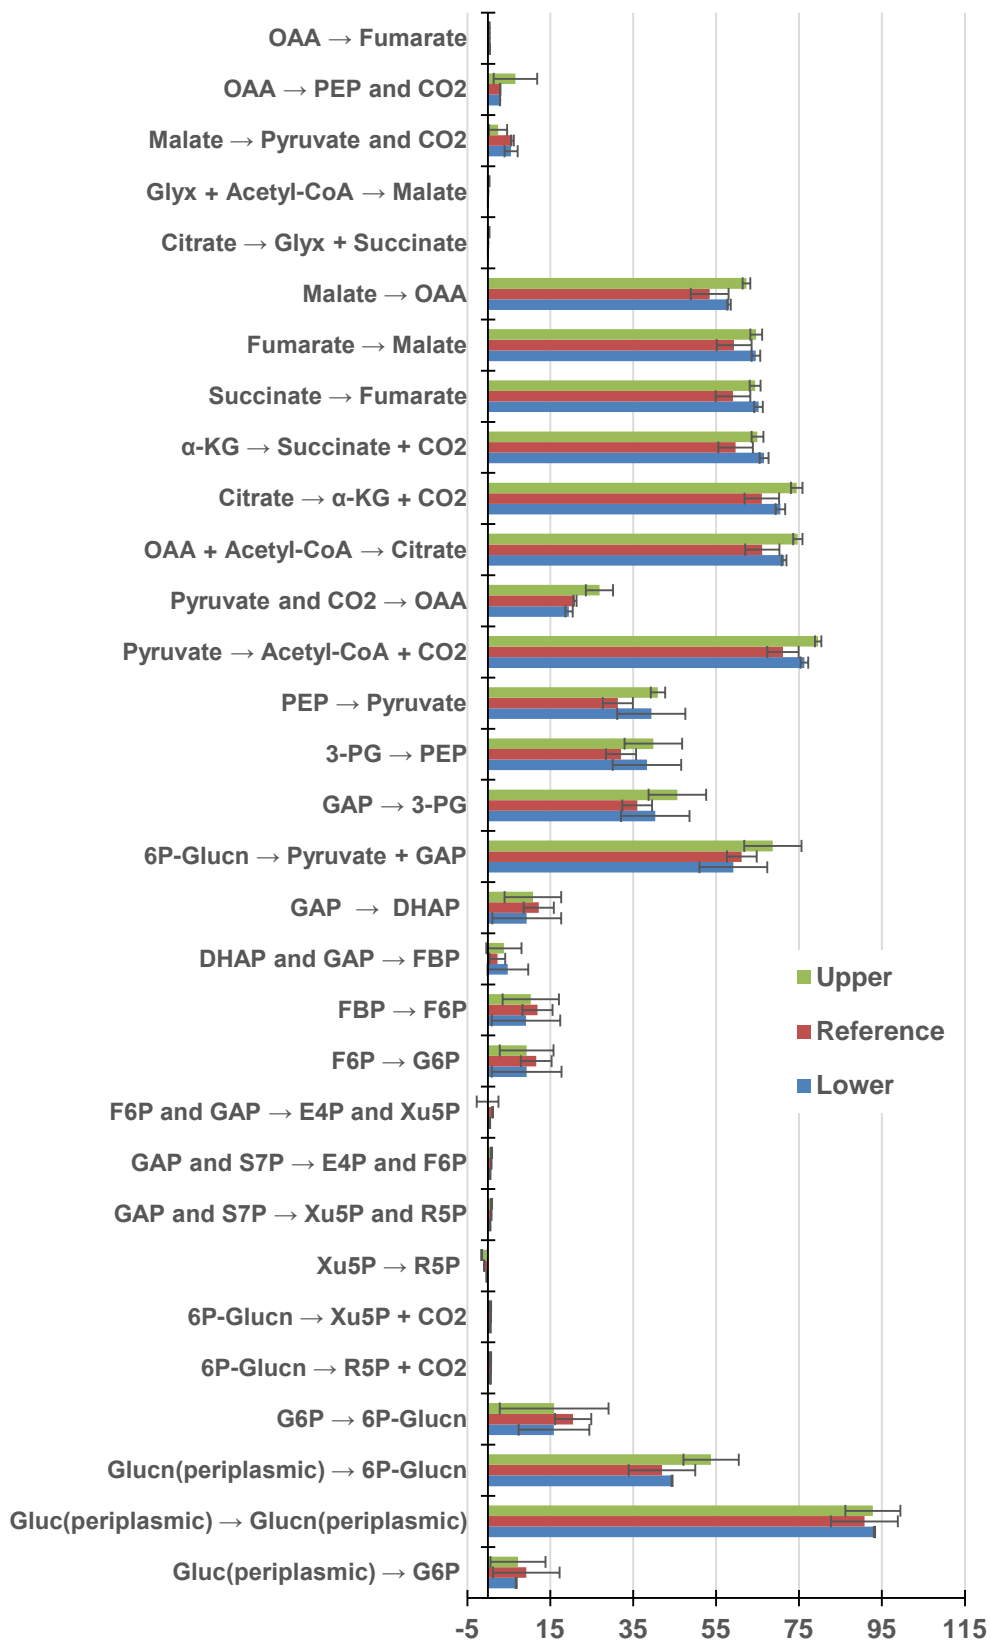

**Fig. S8.** Changes in metabolic reactions rates in response to 100% decrease (lower, blue) and 50% increase (upper, green) in metabolite contribution towards biomass compared to the rates obtained from the reference biomass composition (as detailed Table S4). Model-estimated values (averages  $\pm$  standard deviations) are shown.

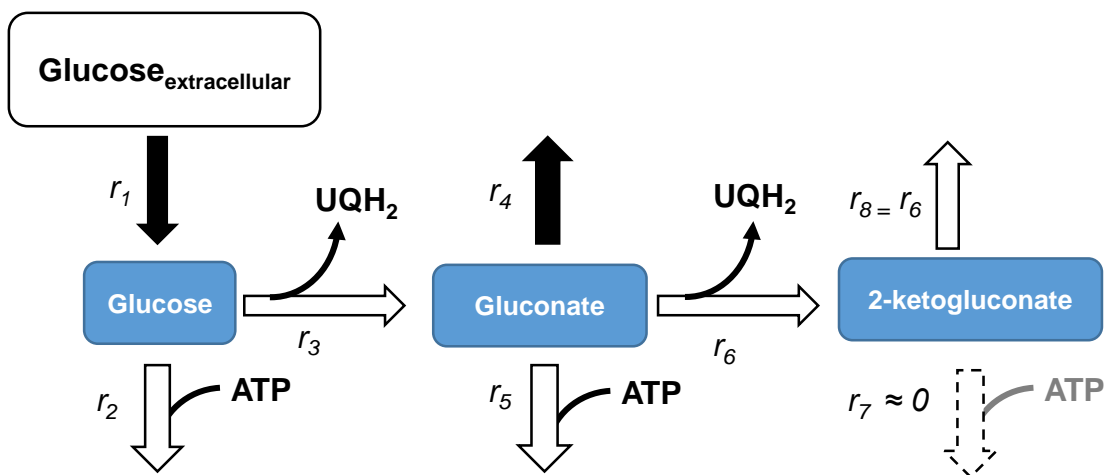

**Fig S9. Estimation of 2-ketogluconate production**

The production of 2-ketogluconate was estimated by taking into account the measured flux ( $r_4$ ) from our experiments and the estimated flux ( $r_4 + r_6$ ) from our metabolic flux analysis for gluconate excretion. The estimated flux was only greater than the measured flux in the Fe-replete cells (see Table S4 below). The difference is taken as a flux out of gluconate to form 2-ketogluconate. The estimate  $r_6$  flux was taken into account in the estimating the total amount of reduced ubiquinone formed in the periplasm from the oxidation of glucose and gluconate.

**Table S5. Estimation of gluconate flux towards 2-ketogluconate**

| Fe conditions                                                | (+Fe)<br>( $\mu\text{mol g}_{\text{CDW}}^{-1} \text{h}^{-1}$ ) | (-Fe)<br>( $\mu\text{mol g}_{\text{CDW}}^{-1} \text{h}^{-1}$ ) |
|--------------------------------------------------------------|----------------------------------------------------------------|----------------------------------------------------------------|
| Measured gluconate excretion ( $r_4$ )                       | $94.7 \pm 13.9$                                                | $1074.1 \pm 223.0$                                             |
| Model-estimated 'excretion' out of gluconate ( $r_4 + r_6$ ) | $125.53 \pm 22.0$                                              | $1201.3 \pm 97.1$                                              |
| Difference (estimated $r_6$ )                                | $30.8 \pm 8.1$                                                 | $127.2 \pm 125.9$                                              |

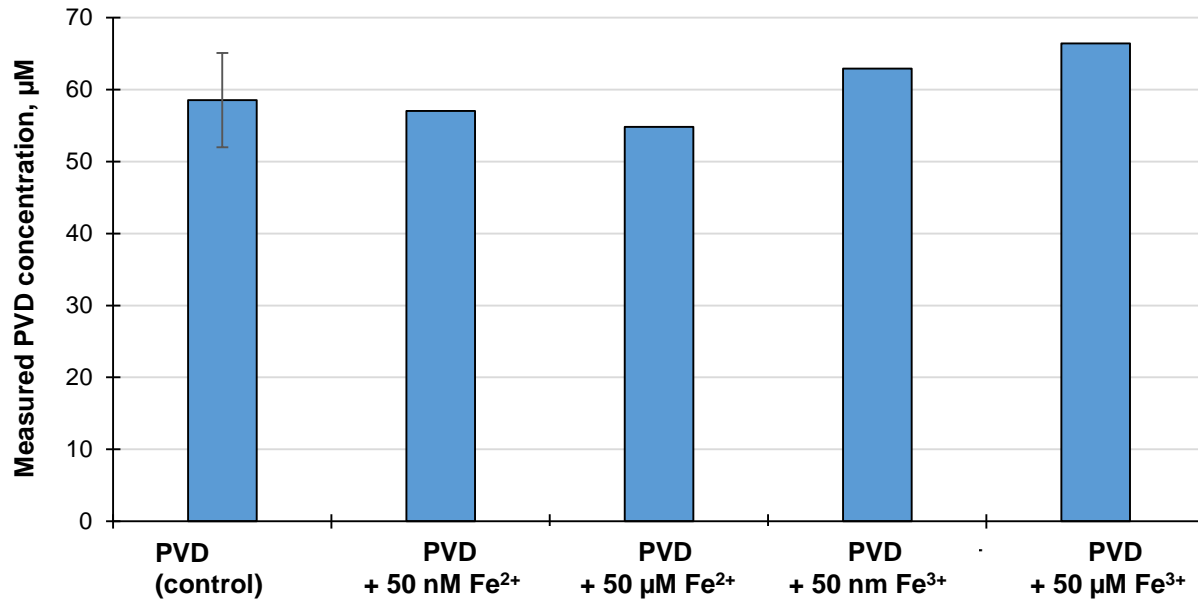

**Fig. S10.** Effects of Fe on pyoverdine (PVD) quantification via UV-vis absorbance (400 nm). Measurements of PVD concentrations in bacterial supernatants in the absence (control) and in the presence of 50 nM or 50  $\mu\text{M}$  of either  $\text{Fe}^{2+}$  ( $\text{FeSO}_4$ ) or  $\text{Fe}^{3+}$  ( $\text{FeCl}_3$ ). Within a precision of two standard deviation values, the quantitation of PVD was not affected by the addition of Fe higher than the concentration in the starting solution in the Fe-replete growth medium ( $\text{Fe}^{2+} = 20 \mu\text{M}$ )

**Table S6.** Metabolite effluxes towards biomass growth determined from the biomass composition of *Pseudomonas putida*.

|                               | Biomass Precursors         |     |      |     |               |      |      |      |                             |     |              |
|-------------------------------|----------------------------|-----|------|-----|---------------|------|------|------|-----------------------------|-----|--------------|
|                               | G6P                        | F6P | R5P  | E4P | GAP<br>(DHAP) | 3PG  | PEP  | Pyr  | Acetyl-<br>CoA <sup>1</sup> | OAA | $\alpha$ -KG |
|                               | (mmol gCDW <sup>-1</sup> ) |     |      |     |               |      |      |      |                             |     |              |
| <i>P. putida</i> <sup>2</sup> | 0.18                       | 0   | 0.39 | 0.4 | 0.17          | 0.91 | 0.82 | 1.78 | --                          | 1.5 | 1.11         |

<sup>1</sup> There was no constraint on the acetyl-CoA efflux in the Fe-replete cells; the model determined this value during the flux balance analysis. In the flux balance analysis in the Fe-limited cells, the rate of acetyl-CoA invested for the pre-pyoverdine production was used as lower-bound value.

<sup>2</sup> Biomass composition obtained from van Duuren, 2013

**Van Duuren J, Puchalka J, Mars AE, Bucker R, Eggink G, Wittmann C, Martins dos Santos V.** 2013. Reconciling in vivo and in silico key biological parameters of *Pseudomonas putida* KT2440 during growth on glucose under carbon-limited condition. BMC Biotechnol. **13**(93).
